# Supplementary material for: HHV-8 Seroprevalence and Genotype Distribution in Africa, 1998–2017: A Systematic Review
Source: PubMed Central journal article supplement (PMC6164965; doi:10.3390/v10090458), 2018-08-27
Supplement: viruses-10-00458-s001.pdf [file viruses-10-00458-s001.pdf]

**Table S1:** Characteristics of studies on Southern African countries included in the analysis

| Reference | Study type    | Country of study | Country of participants | Study population                        | Sample size | Type of assay for sero-prevalence study | No of males | No of females | No of children | Average Age(Age range of participants) | Percentage sero-prevalence | Source of DNA/Antibodies for serology/genotyping | K1 genotypes | K15 genotypes |
|-----------|---------------|------------------|-------------------------|-----------------------------------------|-------------|-----------------------------------------|-------------|---------------|----------------|----------------------------------------|----------------------------|--------------------------------------------------|--------------|---------------|
| [26]      | Retrospective | Ecuador          | Botswana                | Rural based volunteer (Bantu)           | 160         | K8.1 ELISA and LANA IFA                 | N/M         | N/M           | N/M            | 45 (15 -75 years )                     | ELISA=76% IFA =90%         | Blood (sera & buffy coat)                        | A5, B        | P             |
| [26]      | Retrospective | Ecuador          | Botswana                | Rural based volunteer (San)             | 156         | K8.1 ELISA and LANA IFA                 | N/M         | N/M           | N/M            | 45 (15 -75 years)                      | ELISA=88% IFA =79%         | Blood (sera & buffy coat)                        | B            | P, M          |
| [40]      | Retrospective | Botswana         | Botswana                | HIV-AIDS hospital based patients        | 22          | LANA ELISA                              | N/M         | 22            | N/M            | 54 (29 -79 years)                      | 61%                        | X                                                | X            | X             |
| [41]      | Retrospective | USA              | Botswana                | Community based (San)                   | 155         | ELISA and IFA                           | 81          | 69            | N/M            | 36.5 (18 -55 years)                    | 87%                        | Serum/Plasma                                     | X            | X             |
| [41]      | Retrospective | USA              | Botswana                | Community based (Bantu)                 | 161         | ELISA and IFA                           | 89          | 80            | 0              | N/M                                    | 76%                        | Serum/Plasma                                     | X            | X             |
| [23]      | Prospective   | Zambia           | Zambia                  | FI &Endemic KS children, hospital based | 200         | X                                       | N/M         | N/M           | 200            | 20 (6 -34 months)                      | X                          | Biopsy & whole blood                             | A5, B, C, Z  | P, M          |
| [42]      | Retrospective | UK               | Zambia                  | HIV +ve, blood donors and KS patients   | 30<br>116   | ELISA, IFA and WB                       | 25<br>98    | 5<br>18       | 0<br>0         | 27 (18-54 years)<br>38 (16 -70 years)  | 74%                        | KS biopsy                                        | A5, B, C     | P, M          |
| [43]      | Prospective   | Zambia           | Zambia                  | Hospital based                          | 1425        | IFA                                     | 0           | 1425          | N/M            | 23.5 (23 -24 years)                    | 39.9%                      | Plasma                                           | X            | X             |
| [44]      | Retrospective | Zambia           | Zambia                  | Hospital based                          | 5           | X                                       | 5           | 0             | 0              | N/M                                    | X                          | Biopsy                                           | B            | X             |
| [102]     | Retrospective | USA              | Zambia                  | Hospital based patient                  | 5           | X                                       | 5           | 0             | 0              | N/M                                    | X                          | Biopsy                                           | X            | P             |

|      |                       |              |              |                                      |      |                   |     |      |     |                       |          |                 |                    |      |
|------|-----------------------|--------------|--------------|--------------------------------------|------|-------------------|-----|------|-----|-----------------------|----------|-----------------|--------------------|------|
| [45] | Retrospective         | USA          | Zambia       | Hospital based patients              | 40   | ELISA             | 22  | 18   | 0   | 42.5 (17 -68 years)   | 37.5%    | Serum           | X                  | X    |
| [46] | Retrospective         | USA          | Zambia       | Hospital based patients              | 251  | IFA and WB        | 98  | 153  | 0   | 49 (14 -84 years)     | 58%      | X               | X                  | X    |
| [47] | Cross sectional study | USA          | Zambia       | Population based                     | 378  | IFA               | 0   | 378  | N/M | 30 (15 -45 years)     | 48.4%    | X               | X                  | X    |
| [23] | Prospective           | Zambia       | Zambia       | HIV +ve children                     | 287  | X                 | N/M | N/M  | 287 | 30 (15 -45 years)     | X        | Biopsy & blood  | A5, B              | P, N |
| [38] | Prospective           | Brazil       | Zambia       | Cross sectional survey               | 788  | ELISA             | N/M | N/M  | N/M | 23.5 (2 -45 years)    | 14%      | Plasma & Saliva | A5, B, C           | X    |
| [48] | Retrospective         | Mozambique   | Mozambique   | Hospital based                       | 136  | ELISA             | 58  | 78   | 0   | 36.5 (28 -45 years)   | 44.7%    | X               | X                  | X    |
| [49] | Prospective           | Mozambique   | Mozambique   | General population                   | 752  | ELISA             | 263 | 489  | 0   | 30 (10 -50 years)     | 21.4%    | X               | X                  | X    |
| [14] | Retrospective         | England      | South Africa | Hospital based cancer patients       | 3293 | IFA               | N/M | N/M  | N/M | 39 (15 -65 years)     | 32%      | Serum           | X                  | X    |
| [19] | Retrospective         | South Africa | South Africa | Hospital based                       | 136  | ELISA, IFA and WB | 50  | 50   | 36  | 9.5 (1 -18 months)    | 38-95%   | Serum           | X                  | X    |
| [31] | Retrospective         | South Africa | South Africa | AIDS-KS + Endemic KS patients        | 86   | X                 | 53  | 33   | 0   | 36.5 (31 -42 years)   | X        | KS biopsy       | A1, A5, B1, B2, B3 | X    |
| [50] | Prospective           | South Africa | South Africa | Cross sectional HIV + naïve children | 416  | ELISA             | 0   | 0    | 416 | 5.2 (1.5 – 8.9 years) | 28.5%    | Plasma          | X                  | X    |
| [51] | Prospective           | South Africa | South Africa | Population based                     | 427  | ELISA             | 0   | 427  | 0   | 37 (31 – 43 years)    | 7.5 - 9% | Plasma          | X                  | X    |
| [52] | Prospective           | South Africa | South Africa | Hospital based                       | N/M  | ELISA             | N/M | N/M  | N/M | N/M                   | 48%      | Plasma          | X                  | X    |
| [53] | Retrospective         | South Africa | South Africa | Pregnant women, hospital based       | 1740 | ELISA             | 0   | 1740 | 0   | 39.5 (16 -63 years)   | 47.5%    | X               | X                  | X    |

|       |               |              |              |                                              |      |            |      |      |     |                       |       |                                     |           |    |
|-------|---------------|--------------|--------------|----------------------------------------------|------|------------|------|------|-----|-----------------------|-------|-------------------------------------|-----------|----|
| [54]  | Retrospective | USA          | South Africa | Pregnant women, with KS                      | 1228 | ELISA      | 0    | 1228 | 0   | 39.5 (16 -63 years)   | 36.1% | X                                   | X         | X  |
| [54]  | Retrospective | USA          | South Africa | Pregnant women, with KS                      | 1228 | ELISA      | 0    | 1228 | 0   | 36.5 (24 - 45) years) | 19.9% | X                                   | X         | X  |
| [99]  | Retrospective | South Africa | South Africa | AIDS-KS; hospital based                      | 40   | X          | 30   | 10   | 0   | 41.5 (25 -58 years)   | X     | Biopsy                              | A5, B1    | N* |
| [55]  | Retrospective | South Africa | South Africa | Survey                                       | 2191 | ELISA      | 0    | 2191 | 0   | N/M                   | 39.1% | Serum                               | X         | X  |
| [56]  | Retrospective | Zimbabwe     | Zimbabwe     | Women with/without KS and HIV/AIDS           | 41   | ELISA      | 0    | 41   | 0   | 31.5 (1 -62 years)    | 85%   | Serum, PBMC, vaginal, endocervical, | A5        | X  |
| [57]  | Retrospective | Zimbabwe     | Zimbabwe     | AIDS patients                                | 3571 | ELISA      | 2131 | 1440 | 145 | 32.5 (0 -65 years)    | 18.2% | X                                   | X         | X  |
| [103] | Retrospective | Zimbabwe     | Zimbabwe     | AIDS-KS patients                             | 65   | X          | 50   | 15   | 0   | 45 (20 -72 years)     | X     | Blood                               | A5, B     | X  |
| [29]  | Prospective   | Zimbabwe     | Zimbabwe     | AIDS-KS patients                             | 65   | X          | 50   | 15   | 0   | 42 (18 -66 years)     | X     | Blood                               | A5, B     | X  |
| [58]  | Retrospective | Malawi       | Malawi       | Hospitalized patients and healthy volunteers | 272  | K8.1 ELISA | 109  | 143  | 20  | 32.5 (1 -64 years)    | 67%   | X                                   | X         | X  |
| [104] | Retrospective | Malawi       | Malawi       | AIDS-KS patients                             | 5    | X          | 3    | 2    | 0   | 19.5 (7 -32 years)    | X     | Mouth rinse and blood               | A2, A5, B | X  |
| [105] | Prospective   | UK           | Malawi       | AIDS-KS                                      | 22   | IFA        | 11   | 11   | 0   | 48.5 (2 -95 years)    | X     | Mouth rinse and blood               | A, B      | X  |

**Note:** X = no data exist on the parameter, N/M= No mention, PBMC = Peripheral Blood Mononuclear Cells, LANA= Latency-associated nuclear antigen, ELISA = Enzyme-linked Immunosorbent Assay, IFA = Immunofluorescence Assay, WB= Western Blot, KS = Kaposi's Sarcoma, FI = Febrile Infant. N\* = first report of subtype N using ORF75 gene. There are 9 countries in Southern Africa, of which 6 countries had published data meeting the search criteria and date of search.

**Table S2:** Characteristics of studies on Central African countries included in the analysis

| Reference | Study type    | Country of study | Country of participants | Study population                                        | Sample size | Type of assay for sero-prevalence study | No of males | No of females | No of children | Average Age(Age range of participants) | Percentage sero-prevalence | Source of DNA/Antibodies for serology/genotyping | K1 genotypes | K15 genotypes |
|-----------|---------------|------------------|-------------------------|---------------------------------------------------------|-------------|-----------------------------------------|-------------|---------------|----------------|----------------------------------------|----------------------------|--------------------------------------------------|--------------|---------------|
| [13]      | Retrospective | Cameroon         | Cameroon                | HIV +ve and HIV – ve individuals from the rural setting | 516         | ELISA and IFA                           | N/M         | N/M           | N/M            | N/M                                    | 61%                        | Plasma                                           | X            | X             |
| [101]     | Prospective   | France           | Cameroon                | AIDS-KS patients                                        | 49          | X                                       | 36          | 18            | N/M            | 49 (20 -78 years)                      | X                          | KS biopsy                                        | A5, B1, B2   | M, P          |
| [59]      | Retrospective | Cameroon         | Cameroon                | Hospital setting                                        | 16          | ELISA                                   | N/M         | N/M           | N/M            | 35.5 (31 – 40 years)                   | 42.8%                      | Plasma                                           | X            | X             |
| [30]      | Prospective   | Italy            | Cameroon                | AIDS-KS patients                                        | 3           | X                                       | 3           | 0             | 0              | 45.5 (21 -70 years)                    | X                          | KS biopsy                                        | A5           | M, P          |
| [8]       | Prospective   | Cameroon         | Cameroon                | HIV +ve, - ve, KS patients                              | 1177        | ELISA                                   | N/M         | N/M           | N/M            | 34.5 (19 -50 years)                    | 80%                        | Plasma                                           | X            | X             |
| [39]      | Retrospective | Cameroon         | Cameroon                | Rural setting of all aged groups                        | 2063        | LANA IFA                                | 1,096       | 967           | 0              | 44.5 (2 -87 years)                     | 37.2%                      | KS biopsy                                        | A1-4, A5, B1 | P             |
| [60]      | Prospective   | Cameroon         | Cameroon                | Population based                                        | 293         | ELISA                                   | 129         | 164           | 0              | 32.5 (1 -64 years)                     | 50.5%                      | X                                                | X            | X             |
| [61]      | Prospective   | USA              | Cameroon                | AIDS-KS patients                                        | 38          | ELISA                                   | 38          | 0             | 0              | 38 (31 -45 years)                      | 61%                        | X                                                | X            | X             |
| [61]      | Prospective   | USA              | Cameroon                | General population                                      | 3123        | ELISA and IFA                           | N/M         | N/M           | N/M            | N/M                                    | 29.6%                      | X                                                | X            | X             |
| [62]      | Retrospective | Cameroon         | Cameroon                | Pregnant women and prostitutes                          | 274         | IMP                                     | N/M         | 274           | N/M            | 12 (11 -13 years)                      | 38-57%                     | Serum                                            | X            | X             |
| [18]      | Retrospective | France           | Cameroon                | Hospital based-mother-child pair survey                 | 258<br>32   | IFA<br>IFA                              | X<br>X      | X<br>32       | 258<br>X       | N/M                                    | 27.5%<br>47%               | Plasma<br>Plasma                                 | X<br>X       | X<br>X        |

|       |                |                         |                                      |                                |     |                    |     |     |     |                      |            |                         |               |      |
|-------|----------------|-------------------------|--------------------------------------|--------------------------------|-----|--------------------|-----|-----|-----|----------------------|------------|-------------------------|---------------|------|
| [63]  | Retrospective  | Cameroon                | Cameroon                             | Serosurvey-Hospital based      | 292 | IFA                | 129 | 65  | 98  | 22.5 (5 -40 years)   | 39.8-61.8% | Serum                   | X             | X    |
| [12]  | Prospective    | Cameroon                | Cameroon                             | Survey                         | 608 | ELISA              | 134 | 165 | 309 | 44.5 (1 -88 years)   | 59.9       | plasma                  | X             | X    |
| [64]  | Retrospective  | Cameroon                | Paris                                | Pregnant women                 | 567 | ELISA              | 0   | 567 | 0   | 30 (25 – 30 years)   | 45.6%      | Plasma                  | X             | X    |
| [101] | Prospective    | France                  | Central Africa Republic              | AIDS-KS + HIV +ve MCD patients | 12  | X                  | 6   | 6   | 0   | 49 ( 20 – 78 years)  | X          | KS biopsy + lymph nodes | A5, B1, B2, C | M, P |
| [37]  | Retrospective  | France                  | Central Africa Republic              | AIDS-KS patients               | 3   | IFA and IMP        | 2   | 1   | 0   | 22.5 (20 – 25 years) | 100%       | Blood                   | A5            | X    |
| [65]  | Retrospective  | Central Africa Republic | Central Africa Republic              | AIDS-KS patients               | 36  | Lytic and LANA IFA | 15  | 21  | 0   | 31.5 (8 – 50 years)  | 74%<br>71% | Plasma                  | X             | X    |
| [26]  | Prospective    | England                 | Congo                                | AIDS-KS patients               | 23  | ELISA              | N/M | N/M | N/M | 45 (15 – 75 years)   | 17.4%      | X                       | X             | X    |
| [101] | Prospective    | France                  | Congo                                | MCD-HIV +ve patients           | 1   | X                  | 1   | 0   | 0   | 49 (20 – 78 years)   | X          | Tonsil                  | B1            | M    |
| [66]  | Prospective    | Gabon                   | Gabon                                | Hospital based                 | 344 | ELISA              | 0   | 344 | N/M | 31.5 (14 – 49 years) | 31%        | X                       | X             | X    |
| [41]  | Retrospective  | USA                     | Democratic Republic of Congo (Zaire) | Community based Case-control   | 321 | ELISA and IFA      | 155 | 166 | N/M | N/M                  | 82%        | Serum/Plasma            | X             | X    |
| [100] | Restrospective | USA                     | Democratic Republic of Congo (Zaire) | Endemic KS patients            | 1   | X                  | 1   | 0   | 0   | N/M                  | X          | KS biopsy               | B             | X    |
| [38]  | Retrospective  | USA                     | Democratic Republic of Congo (Zaire) | Endemic KS patients            | 1   | X                  | 1   | 0   | 0   | N/M                  | X          | KS biopsy               | X             | P    |

**Note:** X = no data exist on the parameter, N/M= No mention, LANA= Latency-associated nuclear antigen, ELISA = Enzyme-linked Immunosorbent Assay, IFA = Immunofluorescence Assay, IMP = Immunoperoxidase , KS = Kaposi's Sarcoma, MCD = Multicentric Castleman Disease. There are 9 countries in Central Africa, of which 5 countries had published data meeting the search criteria and date of search.

**Table S3: Characteristics of studies on West African countries included in the analysis**

| Reference | Study type      | Country of study | Country of participants | Study population                                 | Sample size | Type of assay for sero-prevalence study | No of males | No of females | No of children | Average Age (Age range of participants) | Percentage sero-prevalence | Source of DNA/Antibodies for serology/genotyping | K1 genotypes | K15 genotypes |
|-----------|-----------------|------------------|-------------------------|--------------------------------------------------|-------------|-----------------------------------------|-------------|---------------|----------------|-----------------------------------------|----------------------------|--------------------------------------------------|--------------|---------------|
| [68]      | Prospective     | Nigeria          | Nigeria                 | Hospital based                                   | 180         | ELISA                                   | 60          | 120           | 0              | 39.5 (15 -64 years)                     | 87%                        | Plasma                                           | X            | X             |
| [69]      | Comparative     | USA              | Nigeria                 | General population                               | 1085        | K8.1 and LANA ELISA                     | 0           | 1085          | N/M            | 39.5 (25 -54 years)                     | 46.02%                     | Plasma                                           | X            | X             |
| [70]      | Cross sectional | Nigeria          | Nigeria                 | AIDS patients with KS<br>KS patients without HIV | 71          | ELISA                                   | 23          | 48            | 0              | 29.5 (19 -40 years)                     | 62%                        | Plasma                                           | X            | X             |
| [71]      | Retrospective   | Nigeria          | Nigeria                 | Population based                                 | 1880        | ELISA                                   | 718         | 1162          | 0              | 25 (0 -50 years)                        | 23.5%                      | X                                                | X            | X             |
| [72]      | Prospective     | Burkina Faso     | Burkina Faso            | Pregnant women (HIV +ve, -ve and AIDS patients)  | 429         | ELISA IFA                               | 0           | 0             | 429            | 31 (18 – 44 years)                      | 11.4%                      | Serum                                            | X            | X             |
| [73]      | Prospective     | Burkina Faso     | Burkina Faso            | Hospital based                                   | 683         | ELISA                                   | 191         | 492           | 0              | 25.3 (16 -45 years)                     | 12%                        | X                                                | X            | X             |
| [105]     | Retrospective   | UK               | Gambia                  | AIDS-KS                                          | 9           | X                                       | 8           | 1             | 0              | 48.5 (2 -95 years)                      | X                          | KS Biopsy                                        | B            | X             |
| [74]      | Retrospective   | Ghana            | Gambia                  | Hospital based                                   | N/M         | ELISA and IFA                           | N/M         | N/M           | N/M            | N/M                                     | 73-83%                     | Serum                                            | X            | X             |
| [44]      | Retrospective   | USA              | Ghana                   | Rural and urban setting                          | 62          | ELISA                                   | 47          | 15            | 0              | 42.5 (17 -68 years)                     | 41.9%                      | X                                                | X            | X             |
| [75]      | Retrospective   | Ghana            | Ghana                   | Hospital based                                   | 410         | ELISA                                   | 365         | 45            | 0              | N/M                                     | 33.5-43.0                  | Serum                                            | X            | X             |
| [76]      | Retrospective   | Ghana            | Ghana                   | Hospital based                                   | 3275        | ELISA                                   | 2573        | 702           | 0              | 41.5 (18 – 65 years)                    | 65.6%                      | X                                                | X            | X             |

|       |               |         |            |                      |     |       |     |     |     |                    |       |            |       |      |
|-------|---------------|---------|------------|----------------------|-----|-------|-----|-----|-----|--------------------|-------|------------|-------|------|
| [26]  | Prospective   | UK      | Ghana      | AIDS-KS patients     | 56  | ELISA | N/M | N/M | N/M | 45 (15 – 75 years) | 23.2% | X          | X     | X    |
| [57]  | Retrospective | France  | Togo       | HIV + MCD patients   | 1   | X     | 1   | 0   | 0   | N/M                | X     | Spleen     | B     | M    |
| [101] | Retrospective | France  | Senegal    | AIDS-KS and IKS      | 2   | X     | 2   | 0   | 0   | 49 (20 -78 years)  | X     | KS biopsy  | B2, C | P, M |
| [77]  | Retrospective | Senegal | Senegal    | HIV + pregnant women | 407 | IFA   | 0   | 407 | 0   | 29.24 (N/M)        | 14.3% | Serum      | X     | X    |
| [101] | Retrospective | France  | Mauritania | MCD                  | 1   | X     | 1   | 0   | 0   | N/M                | X     | Lymph node | A     | N/M  |

**Note:** X = no data exist on the parameter, N/M= No mention, LANA= Latency-associated nuclear antigen, ELISA = Enzyme-linked Immunosorbent Assay, IFA = Immunofluorescence Assay, KS = Kaposi's Sarcoma, MCD = Multicentric Castleman Disease, IKS = Iatrogenic Kaposi's Sarcoma. There are 15 countries in Western African countries, of which 7 countries have published data meeting the search criteria and date of search.

**Table S4:** Characteristics of studies on East African countries included in the analysis

| Reference | Study type    | Country of study | Country of participants | Study population                   | Sample size | Type of assay for sero-prevalence study | No of males | No of females | No of children | Average Age (Age range of participants) | Percentage sero-prevalence | Source of DNA/Antibodies for serology/genotyping | K1 genotypes | K15 genotypes |
|-----------|---------------|------------------|-------------------------|------------------------------------|-------------|-----------------------------------------|-------------|---------------|----------------|-----------------------------------------|----------------------------|--------------------------------------------------|--------------|---------------|
| [100]     | Retrospective | Tanzania         | Tanzania                | Hospital based                     | 248         | ELISA                                   | 97          | 151           | 0              | 25 /(0 -50 years)                       | 33.8%                      | X                                                | X            | X             |
| [78]      | Prospective   | Sweden           | Tanzania                | Hospital based                     | 78          | ELISA                                   | 24          | 54            | 0              | 38 (No range mentioned)                 | 69%                        | Serum                                            | X            | X             |
| [79]      | Prospective   | Tanzania         | Tanzania                | Rural based                        | 798         | ELISA                                   | 357         | 379           | 62             | N/M                                     | 54-93%                     | Serum                                            | X            | X             |
| [74]      | Prospective   | Sweden           | Tanzania                | Hospital based                     | 184         | ELISA and IFA                           | 157         | 27            | 0              | 38 (No range mentioned)                 | 89%                        | Serum                                            | X            | X             |
| [26]      | Prospective   | UK               | Tanzania                | Hospital based                     | 23          | ELISA                                   | N/M         | N/M           | N/M            | 41.5 (15 -75 years)                     | 17.4%                      | X                                                | X            | X             |
| [38]      | Retrospective | USA              | Tanzania                | AIDS-KS patients                   | 2           | X                                       | 2           | 0             | 0              | N/M                                     | X                          | KS Biopsy                                        | A5, B        | P             |
| [80]      | Retrospective | Kenya            | Kenya                   | Hospital based                     | 633         | ELISA                                   | 0           | 633           | 0              | 26 (22 -31 years)                       | 44.1%                      | X                                                | X            | X             |
| [81]      | Prospective   | USA              | Kenya                   | Female sex workers                 | 354         | ELISA                                   | 0           | 354           | 0              | 41 (3 -79 years)                        | 4.5%                       | X                                                | X            | X             |
| [61]      | Prospective   | USA              | Kenya                   | KS patients                        | 39          | ELISA                                   | 39          | 0             | 0              | 38 (31 – 45 years)                      | 29.6%                      | X                                                | X            | X             |
| [82]      | Retrospective | Kenya            | Kenya                   | Population based                   | 1061        | ELISA                                   | 1061        | 0             | 0              | 35 (30 -40 years)                       | 43%                        | X                                                | X            | X             |
| [83]      | Prospective   | Kenya            | Kenya                   | Population based female prostitute | 174         | ELISA                                   | 0           | 174           | 0              | 32 (18 -46 years)                       | 26.0%                      | X                                                | X            | X             |
| [26]      | Prospective   | UK               | Kenya                   | Hospital based                     | 23          | ELISA                                   | N/M         | N/M           | N/M            | 45 (15 -75 years)                       | 17.4%                      | X                                                | X            | X             |
| [30]      | Prospective   | Kenya            | Kenya                   | AIDS-KS                            | 68          | X                                       | 5           | 1             | 62             | N/M                                     | X                          | KS biopsy                                        | A5, B1, C, F | P             |
| [84]      | Prospective   | Kenya            | Kenya                   | Hospital based                     | 228         | LANA                                    | 0           | 228           | 0              | N/M                                     | 63.5%                      | X                                                | X            | X             |
| [100]     | Retrospective | Uganda           | Uganda                  | Hospital based                     | 3196        | ELISA                                   | N/M         | N/M           | 2404           | N/M                                     | 42.4-70.6%                 | X                                                | X            | X             |



|       |               |        |        |                                         |           |                   |          |         |            |                        |            |                     |               |      |
|-------|---------------|--------|--------|-----------------------------------------|-----------|-------------------|----------|---------|------------|------------------------|------------|---------------------|---------------|------|
| [85]  | Retrospective | UK     | Uganda | Hospital based                          | 215       | ELISA, IFA and WB | 76       | 139     | 35         | 1 day – 24 years       | 33-52%     | Serum               | X             | X    |
| [62]  | Retrospective | Uganda | Uganda | Hospital based                          | 118       | IFA               | 0        | 15      | 103        | 25 (11 -39 years)      | 88%        | Serum               | X             | X    |
| [86]  | Retrospective | USA    | Uganda | Random section-population based         | 523       | ELISA and IFA     | 239      | 283     | 0          | 22 ( 15 -29 years)     | 38.5%      | Serum               | X             | X    |
| [106] | Prospective   | Uganda | Uganda | AIDS-KS                                 | 4         | X                 | 3        | 1       | 0          | N/M                    | X          | KS biopsy           | A, B          | X    |
| [107] | Retrospective | Uganda | Uganda | KS patients                             | 56        | X                 | N/M      | N/M     | N/M        | N/M                    | X          | Blood               | A5, B, C, F   | X    |
| [87]  | Prospective   | Uganda | Uganda | Cross-sectional; mother and child study | 2391      | ELISA             | 0        | 1164    | 1227       | 22 ( 14 -30 years)     | 15-69%     | Serum               | X             | X    |
| [88]  | Retrospective | UK     | Uganda | Endemic KS patients and blood donors    | 30<br>118 | ELISA, IFA and WB | 25<br>98 | 5<br>18 | N/M<br>N/M | N/M                    | N/M<br>74% | KS biopsy<br>Plasma | A5, B, C      | M, P |
| [30]  | Prospective   | Italy  | Uganda | AIDS-KS and Endemic KS                  | 14        | X                 | 13       | 1       | 0          | 45.5 (21 -70 years)    | X          | KS biopsy           | A5, B1, B3, C | P    |
| [38]  | Retrospective | USA    | Uganda | AIDS-KS patients                        | 2         | X                 | 2        | 0       | 0          | N/M                    | X          | KS biopsy           | B             | P    |
| [60]  | Prospective   | Uganda | Uganda | Hospital based                          | 315       | ELISA             | 42       | 273     | 0          | 32.5 (1 -64 years)     | 44.8%      | X                   | X             | X    |
| [89]  | Retrospective | Uganda | Uganda | Population based                        | 2681      | ELISA             | 1448     | 1233    | 0          | 29.5 (19 -40 years)    | 56.2%      | X                   | X             | X    |
| [90]  | Retrospective | Uganda | Uganda | Population based                        | 1915      | ELISA             | 0        | 1915    | 0          | 39.5 (14 -35 years)    | 32%        | X                   | X             | X    |
| [50]  | Retrospective | Uganda | Uganda | Population based                        | 427       | ELISA             | N/M      | N/M     | 427        | 5.2 ( 1.5 – 8.9 years) | 9.0%       | X                   | X             | X    |
| [44]  | Retrospective | USA    | Uganda | Hospital based                          | 62        | ELISA             | 44       | 18      | 0          | 42.5 (17 -68 years)    | 45.7%      | X                   | X             | X    |
| [91]  | Retrospective | Uganda | Uganda | Survey                                  | 2681      | ELISA             | N/M      | N/M     | N/M        | 37 (15 -59 years)      | 55.4%      | X                   | X             | X    |

|       |               |          |          |                |     |             |     |     |     |                    |       |                       |          |   |
|-------|---------------|----------|----------|----------------|-----|-------------|-----|-----|-----|--------------------|-------|-----------------------|----------|---|
| [92]  | Retrospective | Uganda   | Uganda   | Hospital based | 461 | ELISA       | 0   | 228 | 233 | 30 (15 -45 years)  | 43%   | X                     | X        | X |
| [108] | Retrospective | Uganda   | Uganda   | Hospital based | 600 | ELISA       | 0   | 600 | 0   | 11.5 (7 -16 years) | N/M   | Saliva and buffy coat | A5, B, C | X |
| [105] | Retrospective | UK       | Uganda   | Hospital based | 7   | X           | N/M | N/M | N/M | 48.5 (2 -95 years) | X     | PBMCs and biopsy      | A5, B, C | X |
| [67]  | Retrospective | USA      | Uganda   | Hospital based | 3   | X           | N/M | N/M | N/M | N/M                | X     | Biopsy                | A, B     | X |
| [26]  | Prospective   | UK       | Uganda   | Hospital based | 23  | ELISA       | N/M | N/M | N/M | 45 (15 -75 years)  | 38.7% | X                     | X        | X |
| [93]  | Retrospective | Ethiopia | Ethiopia | Hospital based | 202 | ELISA ORF73 | N/M | N/M | N/M | N/M                | 39.1% | Serum                 | X        | X |
| [94]  | Retrospective | Ethiopia | Ethiopia | Hospital based | 400 | ELISA ORF7  | 0   | 400 | 0   | N/M                | 53%   | X                     | X        | X |
| [36]  | Retrospective | Eritrea  | Eritrea  | Hospital based | 411 | IFA         | 0   | 227 | 184 | 22 (2 -42 years)   | 2%    | Serum                 | X        | X |

**Note:** X = no data exist on the parameter, N/M= No mention, PBMC = Peripheral Blood Mononuclear Cells, LANA= Latency-associated nuclear antigen, ELISA = Enzyme-linked Immunosorbent Assay, IFA = Immunofluorescence Assay, WB= Western Blot, KS = Kaposi's Sarcoma. There are 12 countries in East Africa, of which 5 countries have published data meeting the search criteria and date of search.

**Table S5:** Characteristics of studies on North African countries included in the analysis

| Reference | Study type    | Country of study | Country of participants | Study population | Sample size | Type of assay for sero-prevalence study | No of males | No of females | No of children | Average Age (Age range of participants) | Percentage sero-prevalence | Source of DNA/Antibodies for serology/genotyping | K1 genotypes | K15 genotypes |
|-----------|---------------|------------------|-------------------------|------------------|-------------|-----------------------------------------|-------------|---------------|----------------|-----------------------------------------|----------------------------|--------------------------------------------------|--------------|---------------|
| [101]     | Retrospective | France           | Algeria                 | HIV+ MCD         | 1           | X                                       | 1           | 0             | 0              | 49 (20 -78 years)                       | X                          | Spleen                                           | C            | P             |
| [17]      | Prospective   | Egypt            | Egypt                   | Hospital based   | 246         | ELISA and IFA                           | 126         | 0             | 196            | 10.5 (1 -20 years)                      | 42.4%<br>7-45%             | X                                                | X            | X             |
| [95]      | Prospective   | Egypt            | Egypt                   | Hospital based   | 86          | IFA                                     | 0           | 0             | 86             | 36 (12 – 46 months)                     | 41.9%                      | X                                                | X            | X             |
| [85]      | Retrospective | Egypt            | Egypt                   | Random selection | 965         | ELISA                                   | N/M         | N/M           | N/M            | N/M                                     | 24.2%                      | X                                                | X            | X             |

|       |             |         |         |                               |     |               |     |     |     |                      |              |        |                      |      |
|-------|-------------|---------|---------|-------------------------------|-----|---------------|-----|-----|-----|----------------------|--------------|--------|----------------------|------|
| [62]  | Prospective | Egypt   | Egypt   | Population based              | 236 | ELISA and IFA | 120 | 116 | 0   | 32.5 (1 -64 years)   | 42.4% 42-43% | X      | X                    | X    |
| [96]  | Prospective | Tunisia | Tunisia | Hospital based Pregnant women | 553 | ELISA         | 0   | 553 | 0   | 25 (20 -30 years)    | 13.8%        | X      | X                    | X    |
| [97]  | Prospective | Tunisia | Tunisia | Hospital based                | 60  | ELISA         | 26  | 34  | 0   | 25 (20 -30 years)    | 17%          | X      | X                    | X    |
| [98]  | Prospective | Morocco | Morocco | KS patients                   | 216 | ELISA         | N/M | N/M | N/M | N/M                  | 28.7%        | X      | X                    | X    |
| [35]  | Prospective | Morocco | Morocco | KS patients                   | 26  | ELISA         | N/M | N/M | N/M | 61.5 (40 – 83 years) | 92%          | X      | X                    | X    |
| [109] | Prospective | Morocco | Morocco | AIDS-KS                       | 28  | X             | 20  | 8   | 0   | 51.5 (23 - 80 years) | X            | Biopsy | A, B, C2, C3, C7 C'' | M, P |

**Note:** X = no data exist on the parameter, N/M= No mention, ELISA = Enzyme-linked Immunosorbent Assay, IFA = Immunofluorescence Assay, KS = Kaposi's Sarcoma, MCD = Multicentric Castleman Disease. There were 7 countries in Northern Africa, of which 4 countries had published data meeting the search criteria and date of search.
